# Supplementary material
Source: HighWire-hosted journal article supplement (https://bmjopen.bmj.com/content/10/3/e032921)
Supplement: inline-supplementary-material-3 [file inline-supplementary-material-3.pdf]

**Appendix 3: Checklists added to observation forms**

Based on previous observations and Makoul and Clayman (2006) and Lindqvist and others (2005).<sup>1,2</sup>

**Checklist Shared Decision making**

| Checklist Shared Decision-Making                 | Yes/No | Comments |
|--------------------------------------------------|--------|----------|
| <i>Essential Elements</i>                        |        |          |
| Definition/Explication of Problem                |        |          |
| Presentation of Options                          |        |          |
| Discussion of Pros/Cons (Benefits/Risks/Costs)   |        |          |
| Explication of Patient Values/Preferences        |        |          |
| Discussion of Patient Ability/Self-Efficacy      |        |          |
| Presentation of Doctor Knowledge/Recommendations |        |          |
| Checking/Clarifying Understanding                |        |          |
| Making or Explicitly Deferring Decision          |        |          |
| Arranging Follow-up                              |        |          |
| <i>Ideal Elements</i>                            |        |          |
| Presentation of Unbiased Information             |        |          |
| Definition of Roles (Desire for Involvement)     |        |          |
| Presentation of Evidence                         |        |          |
| Reaching Mutual Agreement                        |        |          |
| <i>General Qualities</i>                         |        |          |
| Deliberation/Negotiation                         |        |          |
| Flexibility/Individualized Approach              |        |          |
| Information Exchange                             |        |          |
| Involves at least Two People                     |        |          |
| Middle Ground                                    |        |          |
| Mutual Respect                                   |        |          |
| Partnership                                      |        |          |
| Patient Education                                |        |          |
| Patient Participation                            |        |          |
| Process/Stages                                   |        |          |

**Checklist interprofessional attitudes**

| Checklist Interprofessional Attitudes |                          | Comments |
|---------------------------------------|--------------------------|----------|
| Caring                                | Non-Caring               |          |
| Empathetic                            | Non-Empathetic           |          |
| Approachable                          | Non-Approachable         |          |
| Values Team Work                      | Does not Value Team Work |          |
| Sympathetic                           | Non-Sympathetic          |          |
| Thoughtful                            | Not Thoughtful           |          |
| Flexible                              | Not Flexible             |          |
| Patient-Centered                      | Not Patient-Centered     |          |
| Not Self-Centered                     | Self-Centered            |          |
| Gentle                                | Rough                    |          |
| Not Arrogant                          | Arrogant                 |          |
| Practical                             | Theoretical              |          |
| Conciliatory                          | Not Conciliatory         |          |
| Vulnerable                            | Confident                |          |
| Non-Assertive                         | Assertive                |          |
| Does not Value Autonomy               | Values Autonomy          |          |
| Not technically Focused               | Technically Focused      |          |
| Not Independent                       | Independent              |          |
| Not Confrontational                   | Confrontational          |          |
| <i>Willingness to Collaborate</i>     |                          |          |
| <i>Trust</i>                          |                          |          |
| <i>Communication</i>                  |                          |          |
| <i>Mutual Respect</i>                 |                          |          |

References:

1. Makoul G, Clayman ML. An integrative model of shared decision making in medical encounters. *Patient education and counselling* 2006;60(3):301-312.
2. Lindqvist S, Duncan A, Shepstone L, Watts F, Pearce. Development of the 'Attitudes to Health Professionals Questionnaire' (AHPQ): A measure to assess interprofessional attitudes. *Journal of Interprofessional Care* 2005;19(3):269-279.
